# Supplementary material
Source: PubMed Central journal article supplement (PMC2722224)
Supplement: ddp093_1.pdf [file ddp093_1.pdf]

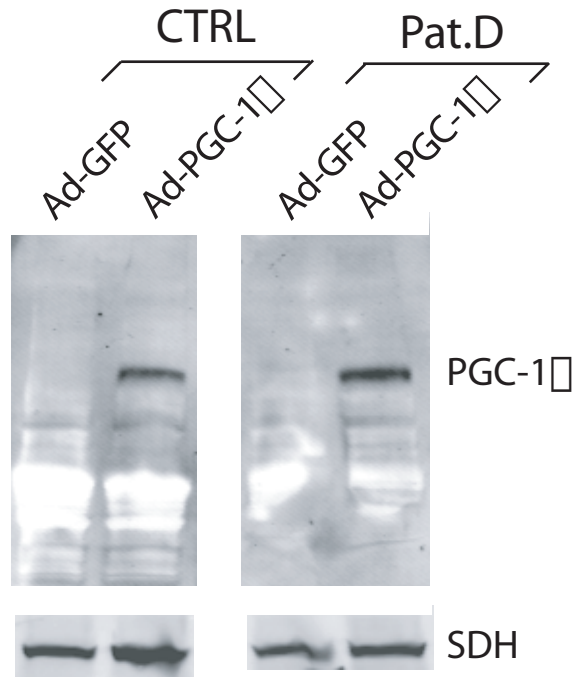

**Supplementary figure S1. PGC-1 $\alpha$  expression in cells transduced with the Ad-PGC-1 $\alpha$  adenovirus.** The figure shows a western blot from two representative cell lines after 48 h transduction with the Ad-PGC1 $\alpha$  virus. The Flavoprotein of SDH was used as loading control.
